# Supplementary material for: Exome sequencing and CRISPR/Cas genome editing identify mutations of ZAK as a cause of limb defects in humans and mice
Source: HighWire-hosted journal article supplement (doi:10.1101/gr.199430.115), 2016-01-11

**SUPPLEMENTAL INFORMATION**

**Exome sequencing and CRISPR/Cas genome editing identify mutations of ZAK as a cause of limb defects in humans and mice**

Malte Spielmann1-3,15, Naseebullah Kakar4-6,15, Naeimeh Tayebi1, Catherine Leettola7, Gudrun Nürnberg8, Nadine Sowada4,5, Darío G Lupiáñez1,2,9, Izabela Harabula1, Ricarda Flöttmann2, Denise Horn2, Wing Lee Chan2,Lars Wittler1, Rüstem Yilmaz4,5, Janine Altmüller8, Holger Thiele8,Hans van Bokhoven10, Charles E Schwartz11, Peter Nürnberg8,12,13, James U Bowie7, Jamil Ahmad6, Christian Kubisch14, Stefan Mundlos1-3 & Guntram Borck4

1Max-Planck-Institute for Molecular Genetics, Berlin, Germany

2Institute for Medical Genetics and Human Genetics, Charité Universitätsmedizin Berlin, Berlin, Germany

3Berlin-Brandenburg School for Regenerative Therapies (BSRT), Berlin, Germany

4Institute of Human Genetics, University of Ulm, Ulm, Germany

5International Graduate School in Molecular Medicine Ulm, University of Ulm, Ulm, Germany

6Department of Biotechnology and Informatics, BUITEMS, Quetta, Pakistan

7Department of Chemistry and Biochemistry, UCLA-DOE Institute of Genomics and Proteomics; University of California, Los Angeles, USA

8Cologne Center for Genomics, University of Cologne, Cologne, Germany

9Berlin-Brandenburg Center for Regenerative Therapies (BCRT), Berlin, Germany

10Department of Human Genetics, Radboud University Medical Center, Nijmegen, The Netherlands

11J.C. Self Research Institute, Greenwood Genetic Center, Greenwood, USA

12Cologne Excellence Cluster on Cellular Stress Responses in Aging-Associated Diseases (CECAD), University of Cologne, Cologne, Germany

13Center for Molecular Medicine Cologne, University of Cologne, Cologne, Germany

14Institute of Human Genetics, University Medical Center Hamburg-Eppendorf, Hamburg, Germany

15These authors contributed equally to this work

Correspondence should be addressed to S.M. (stefan.mundlos@charite.de) or G.B. (guntram.borck@uni-ulm.de)

**SUPPLEMENTAL INFORMATION**

**Suppl. Fig. 1**

A) Pedigree of family 1 with haplotypes for markers in the chromosome 2q31 linkage region. The disease haplotype is shown in *red*. The linkage region (boxed) is flanked by recombinant SNP markers rs836624 and rs6433931. Genotypes for rare sequence variants identified by exome sequencing in the linkage region are also shown.

B) Sequence chromatograms of parts of *ZAK* exon 14 showing the c.1103T>G (p.Phe368Cys) mutation in family 1.


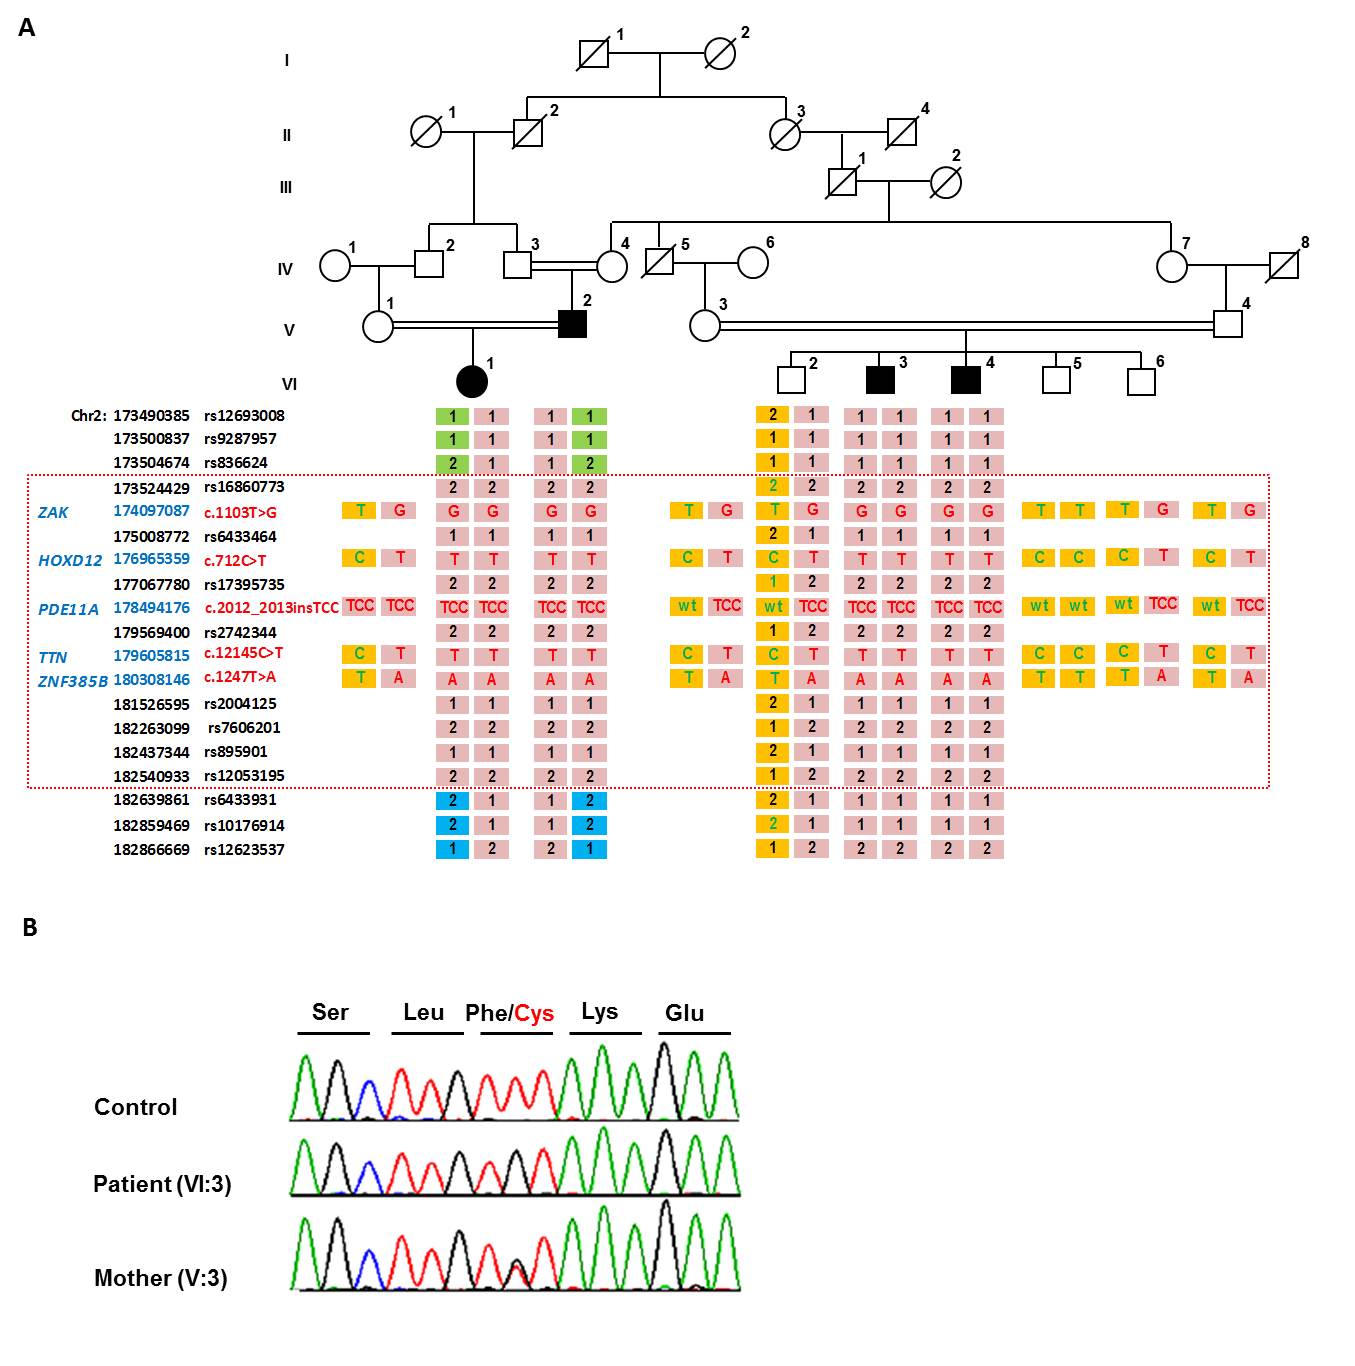


**Suppl. Fig. 2:** Audiograms of three affected individuals in family 1 showing moderate-to-severe bilateral sensorineural hearing impairment.


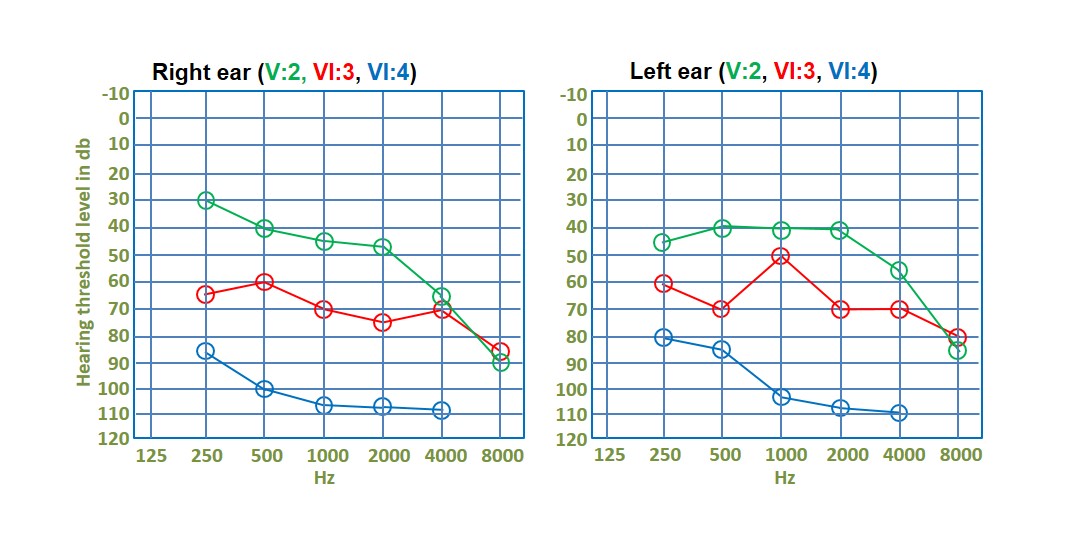


**Suppl. Fig. 3:** *In situ* hybridization using a probe for *Znf385b* on mouse embryos. *Znf385b* is mainly expressed in the central nervous system and the heart, with limited expression in the limbs. FL, forelimb; HL, hindlimb.


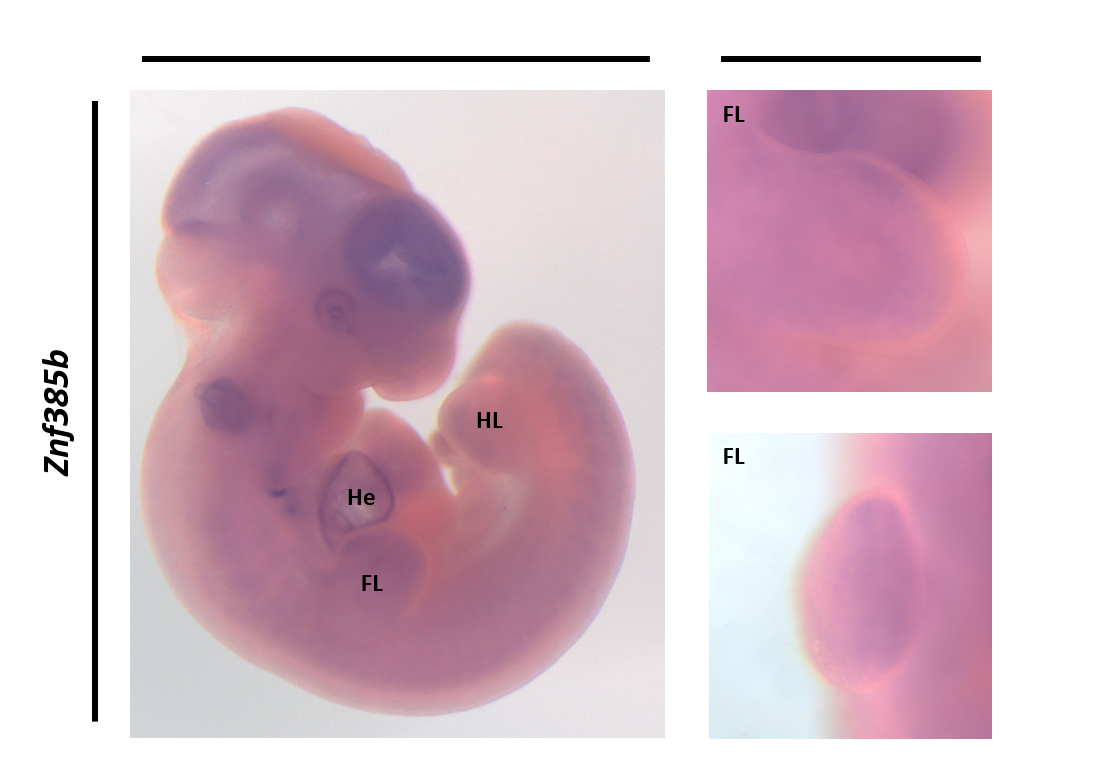


**Suppl. Fig. 4: Homozygous intragenic deletion of *ZAK***

A) High resolution array CGH in an affected boy from Tunisia from family 2 revealed a homozygous intragenic deletion of *ZAK*

B) qPCR analysis showed that the deletion was heterozygous in his unaffected first cousin parents and homozygous in the affected boy.

C) Sanger sequencing of a junction fragment PCR confirmed a 14.7 kb deletion removing exons 12-16 of *ZAK*. An insertion of 31 bp occurred at the deletion site.


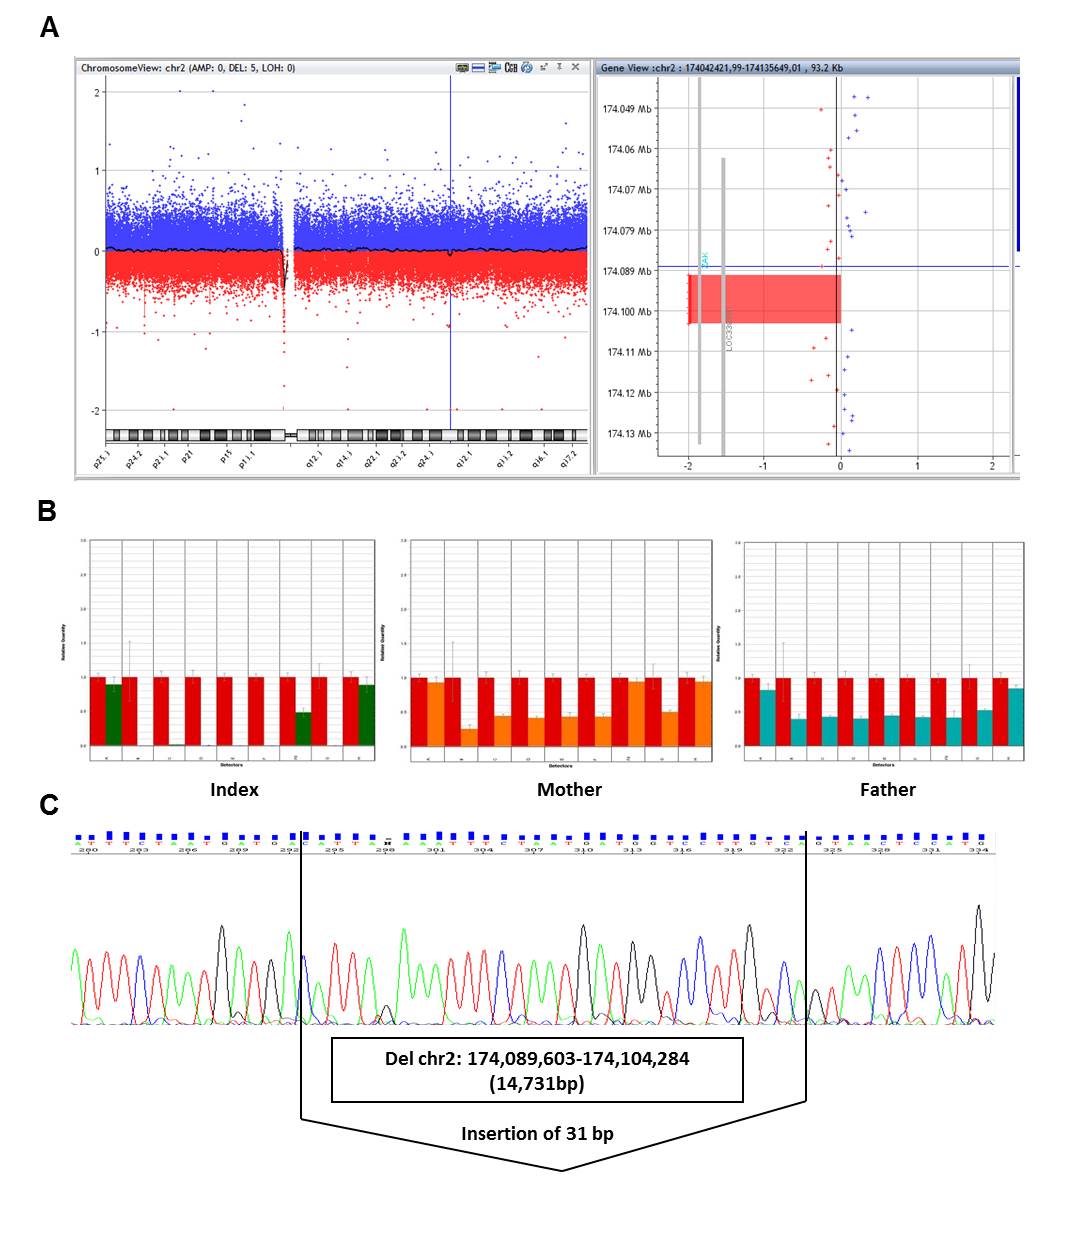


**Suppl. Fig. 5:** The CRISPR/Cas-mediated deletion in *Zak* exon 2 is embryonically lethal in mice.

A) Wild-type sequence and homozygous mutation in exon 2 of *Zak* in two independent clones. SgRNA sequence is marked in *red*.

B) The complete inactivation of *Zak* in mice resulted in fully penetrant lethality at E9.5 due to cardiac malformation. The homozygous mice showed severe cardiac edema and global growth retardation and were subsequently absorbed between E9.5 and E10.5.


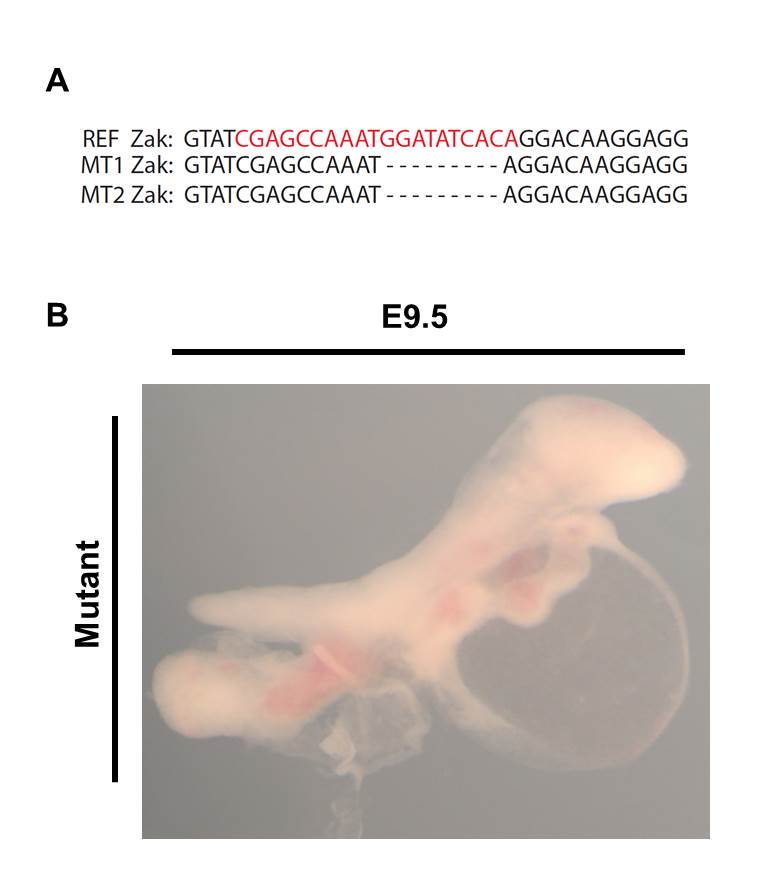


**Suppl. Fig. 6:** Off-target analysis

1. The deletion was predicted to be *in frame* and *Zak* mRNA expression was normal in mutant limbs. Exon 14-15 and exon 15-16 showed a homozygous deletion.
2. Based on the *in silico* predictions (crispr.mit.edu/) the most likely off-target mutations were analysed via Sanger sequencing. No predicted off-target mutation was found.


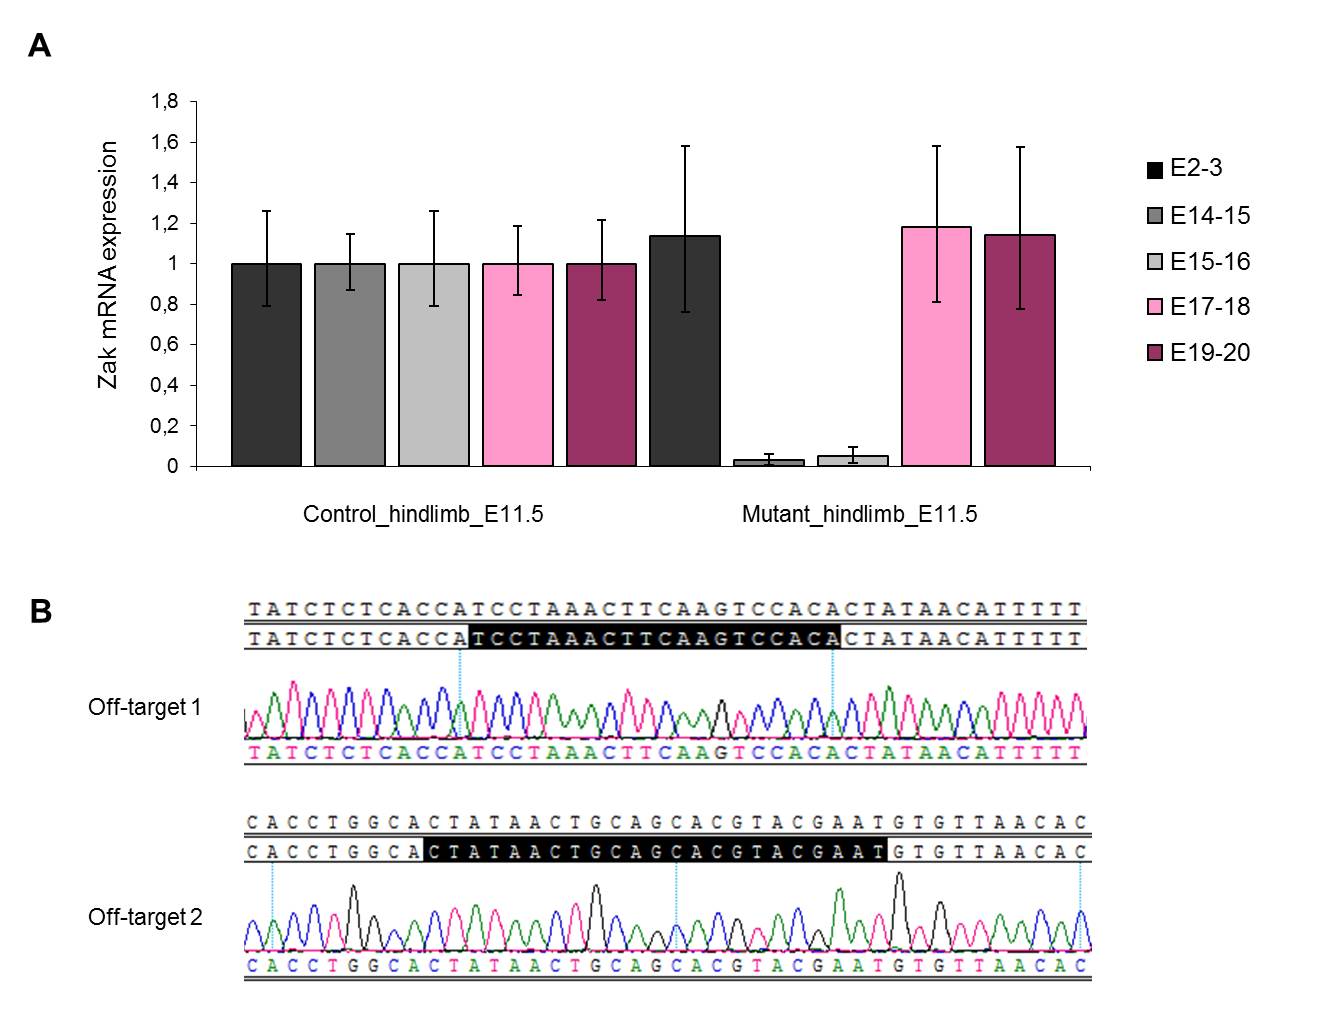


**Suppl. Fig. 7:** Two *Zak-/-* mice showed a polydactyly of the feet representing a minimal variant of a distal duplication defect.


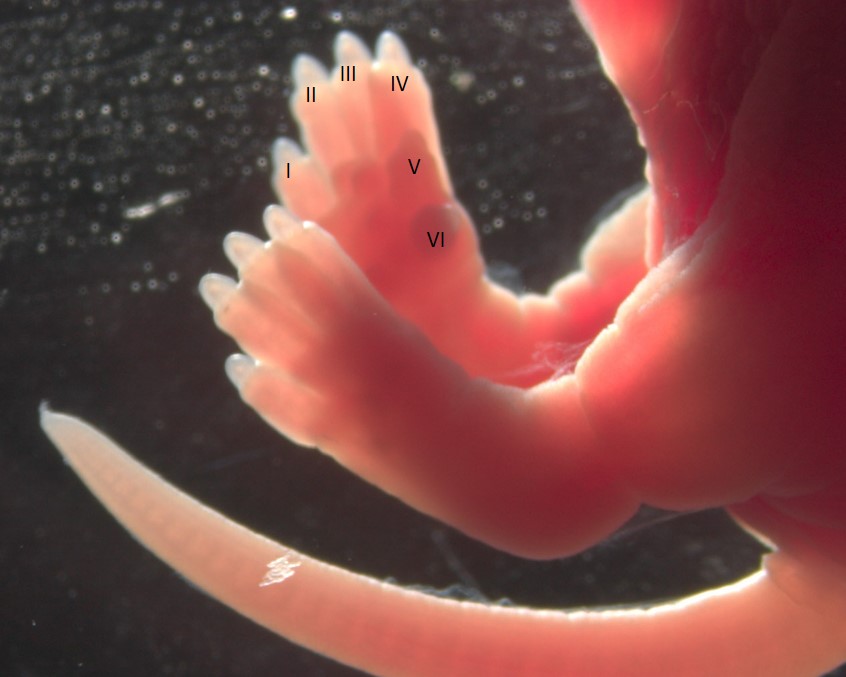


**Suppl. Fig. 8:** Whole mount *in situ* hybridizations at E11.5 in *Zak*-/- mice with a deletion of exons 12-16

*In situ* hybridization in chimeric and homozygous embryos for *Fgf8*, *Shh* and *Tp63* showed a normal staining pattern in WT and *Zak* mutant mice at E10.5.


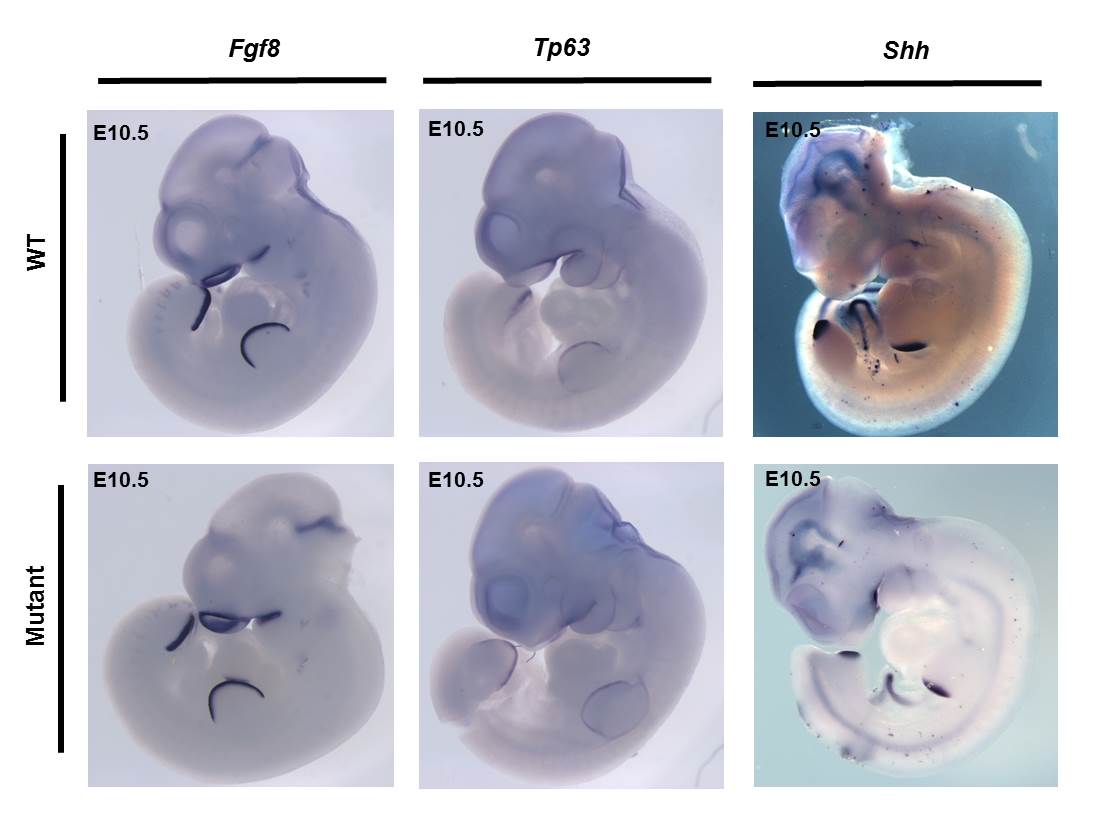


**Suppl. Fig. 9:** ZAK SAM domain circular dichroism

Thermal denaturation curves of wild-type ZAK-SAM and ZAK-SAM Phe368Cys monitored by circular dichroism signal at 222 nm. Wild-type ZAK-SAM exhibits cooperative unfolding while the Phe368Cys mutant exhibits non-cooperative unfolding and is highly unstructured.


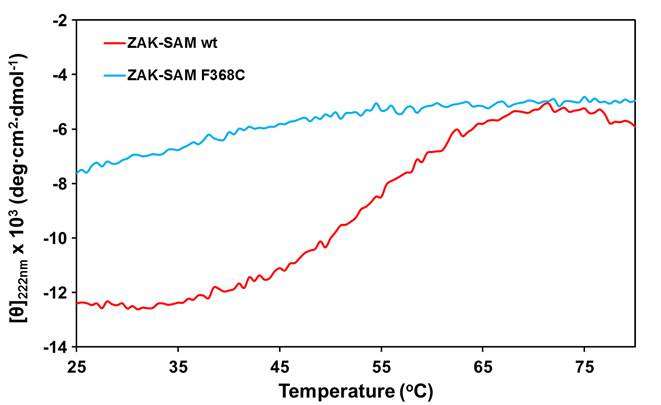


**Suppl. Fig. 10:** Homozygous deletion in mouse ESCs of exons 12 - 16 of *Zak.*

1. Two sgRNAs located in the introns centromeric and telomeric to exons 12 and 16 of *Zak* were designed and cotransfected in mouse ESCs to induce double strand breaks at the desired positions. Two clones (out of 288) with a homozygous deletion of the 12 kb fragment were detected. Clone G12
2. Homozygous deletion in mouse ESCs of exons 12 - 16 of *Zak*in clone B3


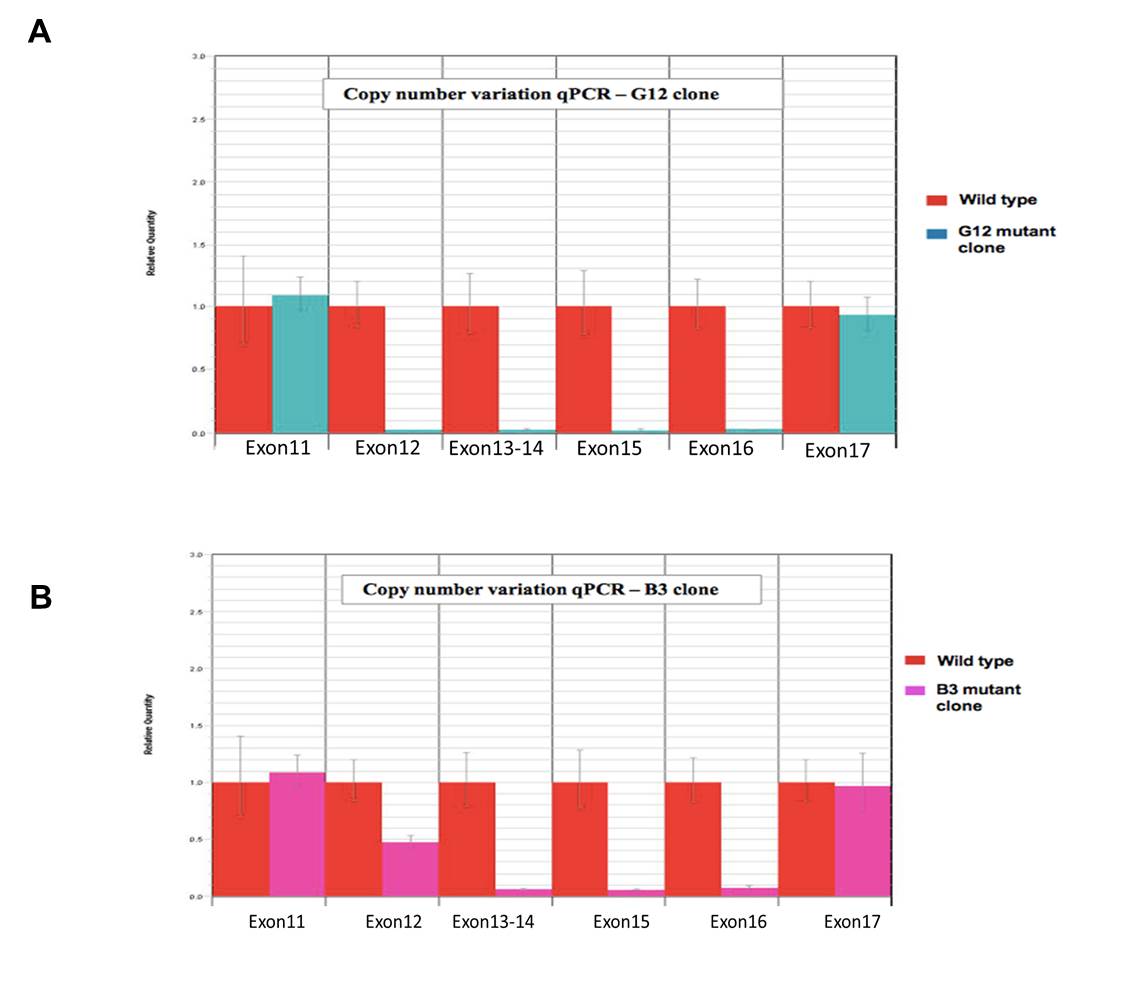


**Suppl. Table 1:** Rare sequence variants detected by exome sequencing in the linkage region on chromosome 2q31 in family 1.


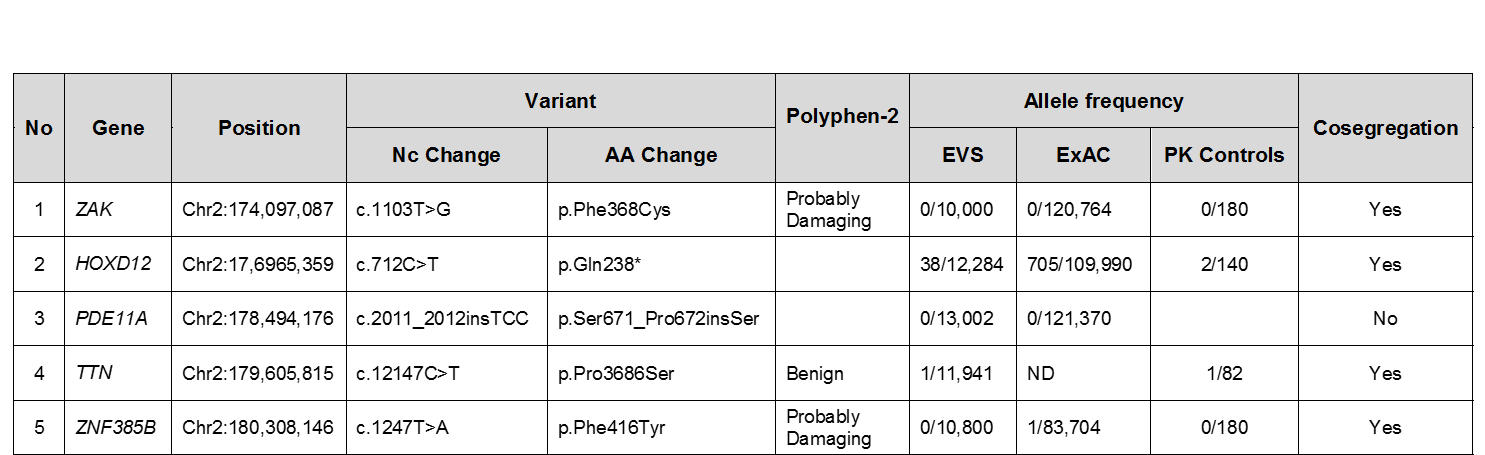


a Genomic positions are based on the GRCh37/hg19 human genome assembly.

b The c.712C>T (p.Gln238*) variant in *HOXD12* was interpreted as non-pathogenic because i) its allele frequency was too high in controls to explain a rare disease and ii) it leads to a predicted stop gain only in the minor transcript ENST00000404162, whereas it represents a synonymous change in the canonical transcript NM_021193.3.

aa, amino acid; Chr, chromosome; EVS, exome variant server; ExAC, exome aggregation consortium; nc, nucleotide; ND, not determined; PK, Pakistani.

Suppl. Table 2: primer sequences for Sanger sequencing of ZAK in Hg19

| **Primer sequences in hg19** | **Primer sequences in hg19** |
| --- | --- |
| **Exon2: 159 bp** | **Exon12: 45 bp** |
| F_CTGGAAGTTTCACAGGACTCG | F_ CAGCAGCTGAGAGCTGAAAG |
| F_ CCCTGTGACCCTCTAACTCG | R_ GACTTTCCTAAGGCCCAATC |
|  |  |
| **Exon3: 88 bp** | **Exon13-14: 268 bp** |
| F_ GAGTAGGAAGCCTGTTTTATTTGAC | F_ TGTGAAGACTGGCCACTGAC |
| R_ AACACACAATTCATAACTGAGCC | R_ caacagagcaagactctgcc |
|  |  |
| **Exon4: 102 bp** | **Exon15: 63 bp** |
| F_TGACATTAACTTTTAGAAACCACACC | F_ TTTGTTTGTACCCAATGATTTTAGTC |
| R_ATTTCAGGAGGGGAAAATGC | R_GCAGCAGGTGCATGTGTC |
|  |  |
| **Exon5: 66 bp** | **Exon16: 93 bp** |
| F_CATGTGAATTAGTTTCTGCTCTTG | F_ GGCATAATATGTCATTTCTGTTGG |
| R_aaggcttccatggtatcagc | R_ GACTGGATTACAGAGGCAGC |
|  |  |
| **Exon6-7: 283 bp** | **Exon17: 123 bp** |
| F_ CACCTTTCATAATCCCATATTGAAG | F_ AAGGCTGCACTAACTGGGG |
| R_TTAGGCATTCCACCAGCAG | R_ AAATGTGCCTTTCAACAGCC |
|  |  |
| **Exon8: 87 bp** | **Exon18: 75 bp** |
| F_ TTCTACAGTTGGGGTTGGTTG | F_aattgtgtatggcacaaccg |
| R_ ACTGCTAATCTTTCCATAAGCG | R_ATCTCCCAATAAATTATATGCTCTG |
|  |  |
| **Exon9: 75 bp** | **Exon19: 151 bp** |
| F_ CCTTCAGATACGGTGTTTGC | F_ CCTGGATGACTTTCTTTCCC |
| R_ GGAGCATCAATCCAGCTTTG | R_ctgatTGAGGTGGTATCCTCTG |
|  |  |
| **Exon10: 107 bp** | **Exon20_1: 350 bp** |
| F_ AAGAATAGAGCTCCCTAAACCTG | F_ CCCAAACAGCCCTGAATTATC |
| R_TTCATTGAGACGAGTGATGGTC | R_TGAAGGAGTGGAATGCTGAC |
|  |  |
| **Exon11: 136 bp** | **Exon20_2: 350 bp** |
| F_ AGCACCAGCATGTGTCTTTTAC | F_GGACAGTGGCTTTTCCAGTG |
| R_ GGGAAGAGGTGCCATGC | R_TTTCGTTAATTCAATCTGAAGGG |

Suppl. Table 3: primer sequences and positions
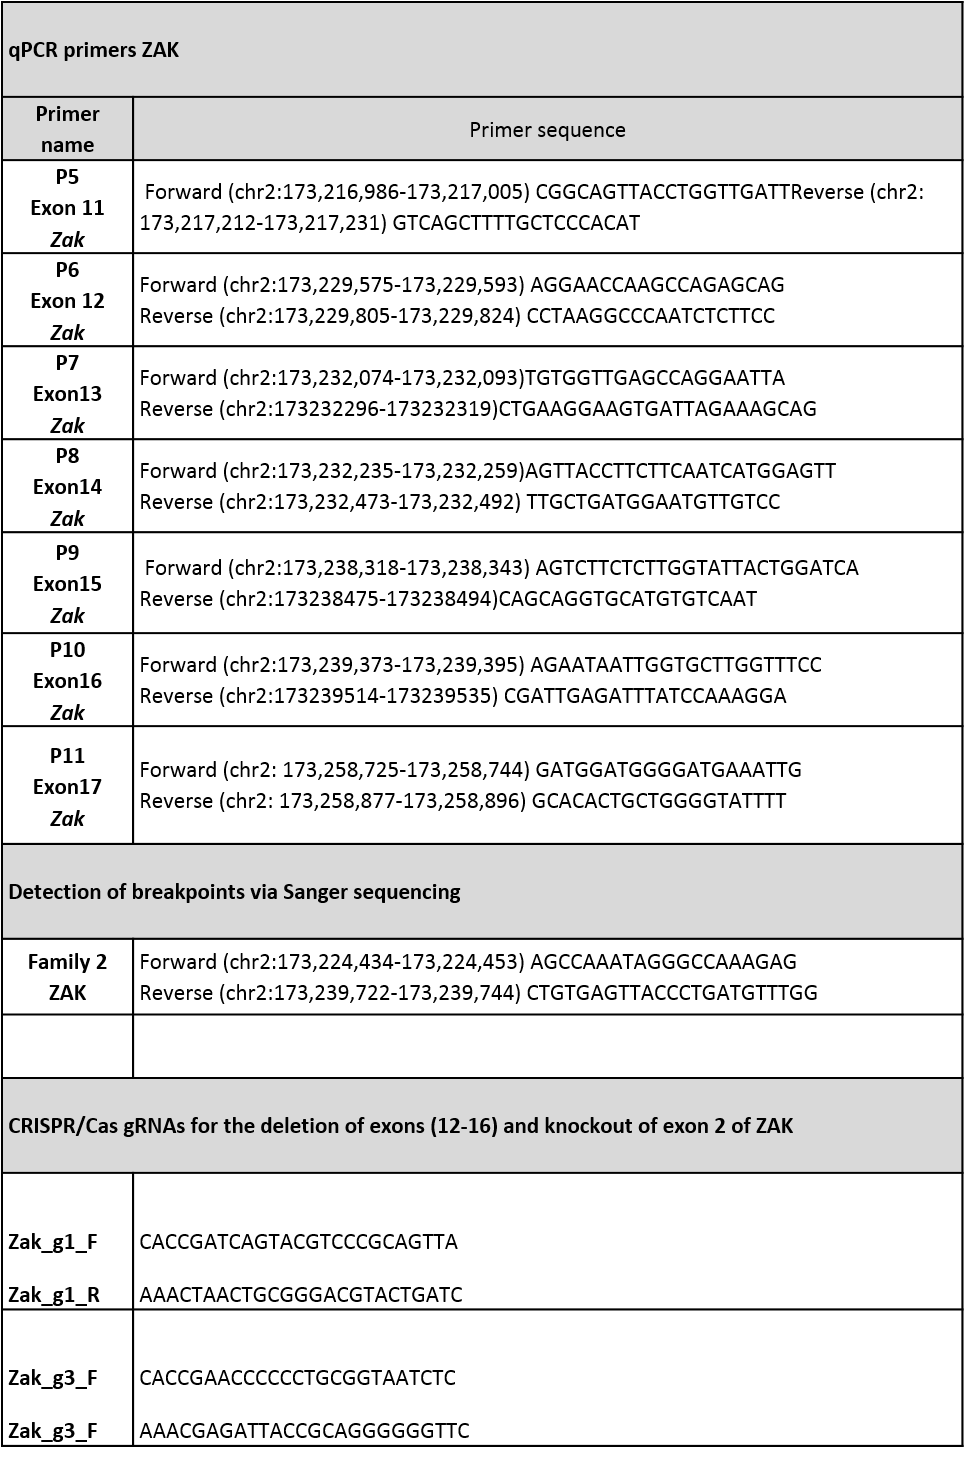

Supplement: Supplemental_Information.docx [file Supplemental_Information.docx]
